# Supplementary material for: Myeloid sirtuin 6 deficiency accelerates experimental rheumatoid arthritis by enhancing macrophage activation and infiltration into synovium
Source: PubMed Central journal article supplement — eBioMedicine. 2018 Nov 11;38:228–37. doi: 10.1016/j.ebiom.2018.11.005 (PMC6306347; doi:10.1016/j.ebiom.2018.11.005), 2018-11-11
Supplement: mmc1.pdf [file mmc1.pdf]

# **Myeloid sirtuin 6 deficiency accelerates experimental rheumatoid arthritis by enhancing macrophage activation and infiltration into synovium**

Seong Ji Woo<sup>a,\*</sup>, Hae Sook Noh<sup>b,\*</sup>, Na Young Lee<sup>c</sup>, Yun-Hong Cheon<sup>b</sup>, Sang Mi Yi<sup>b</sup>, Hyun Min Jeon<sup>b</sup>, Eun Ju Bae<sup>d</sup>, Sang-Il Lee<sup>b,¶</sup>, and Byung-Hyun Park<sup>a,¶</sup>

<sup>a</sup>Department of Biochemistry and Molecular Biology, Chonbuk National University Medical School, Jeonju, Jeonbuk 54896, Republic of Korea

<sup>b</sup>Department of Internal Medicine, Gyeongsang National University School of Medicine, Jinju, Gyeongnam 52828, Republic of Korea

<sup>c</sup>Department of Internal Medicine, Chonbuk National University Medical School, Jeonju, Jeonbuk 54896, Republic of Korea

<sup>d</sup>College of Pharmacy, Woosuk University, Wanju, Jeonbuk 55338, Republic of Korea

## **Contents**

1. Supplementary Figures
2. Supplementary Tables

## 1. Supplementary Figures

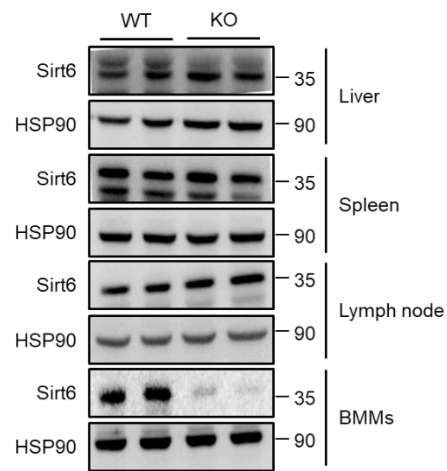

**Figure S1. Generation of myeloid-specific Sirt6 KO (mS6KO) mice.** Myeloid-specific deletion of Sirt6 was confirmed by Western blotting. BMMs, bone marrow macrophages.

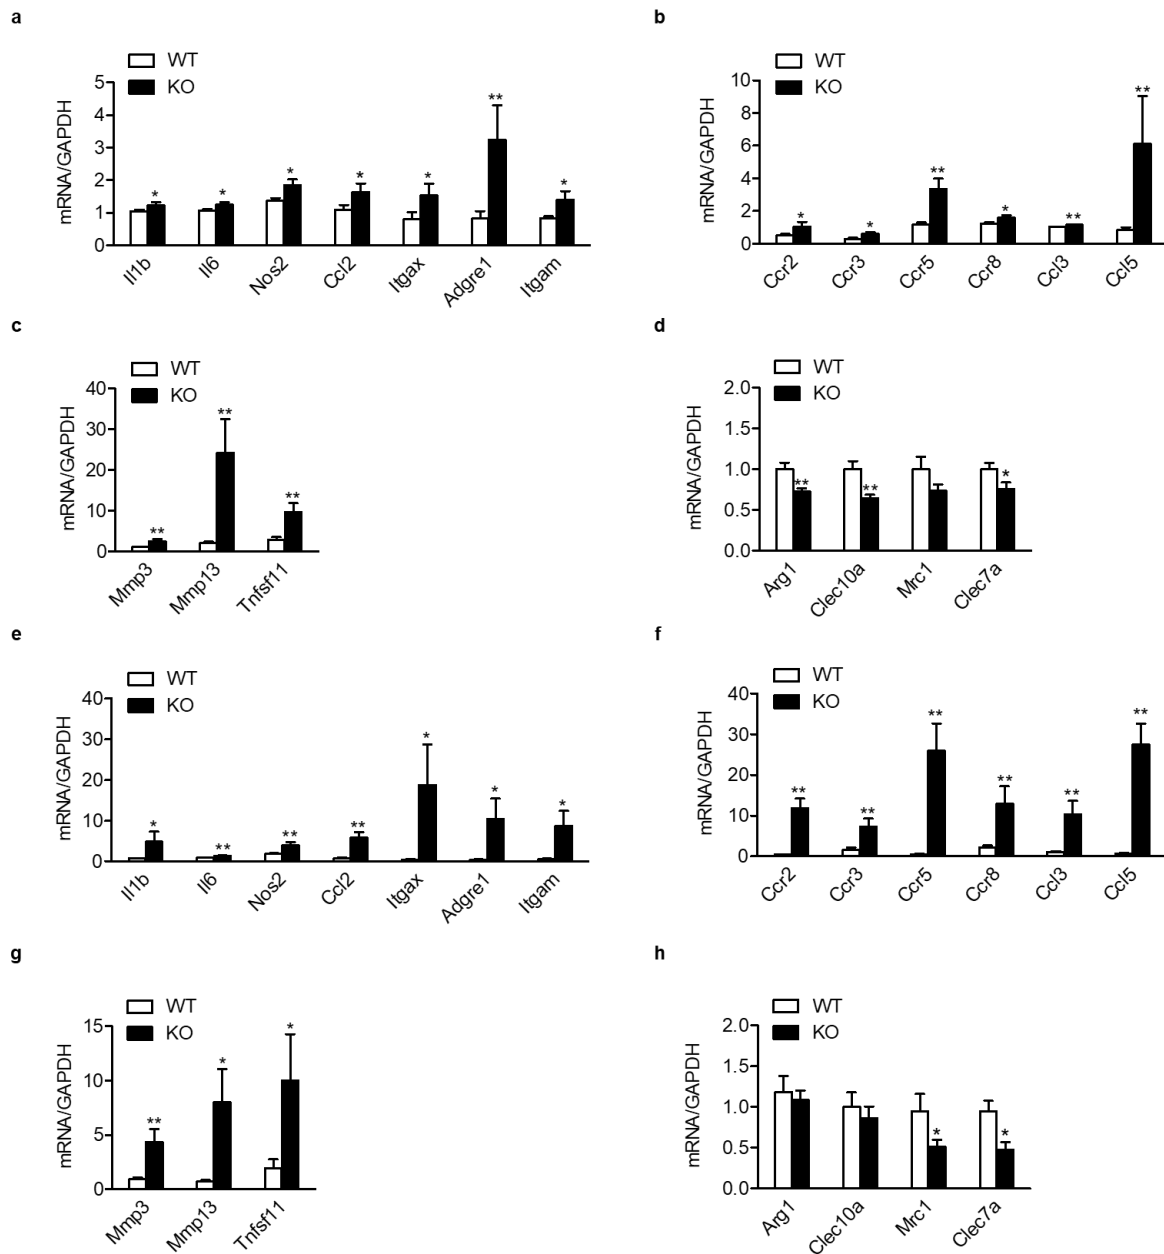

**Figure S2. Effects of myeloid Sirt6 deficiency on the expression of M1/M2 macrophages- and inflammation-related genes in mS6KO mice with CIA (A-D) or K/BxN serum transfer arthritis (E-H).** mRNA levels of (A, E) M1 macrophage-related genes (IL-1 $\beta$ , IL-6, iNOS, MCP-1, CD11c, F4/80, and CD11b), (B, F) chemokines (CCL3/5) and chemokine receptors (CCR2/3/5/8), (C, G) proteases (MMP3/13) and RANKL, (D, H) M2 macrophages-related genes in the ankle joints. Values are mean $\pm$ SEM (n=10-12). \*,  $p < 0.05$  and \*\*,  $p < 0.01$  vs. WT.

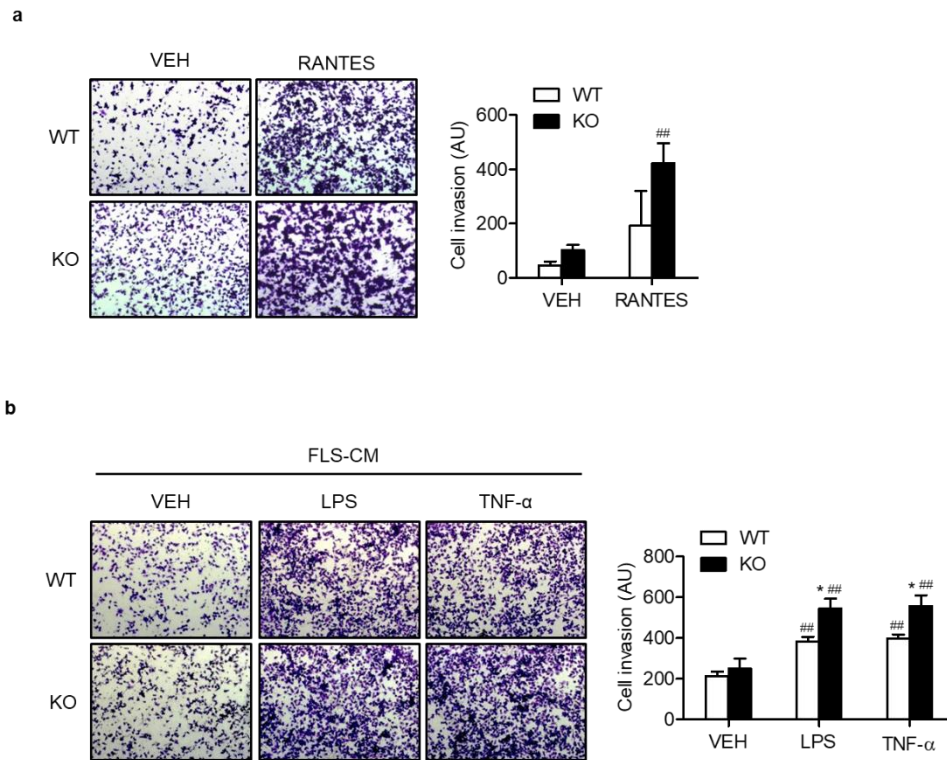

**Figure S3. Regulation of macrophage invasion by Sirt6.** (a, b) BMMs from WT or mS6KO mice were allowed to migrate through porous membranes for 24 h toward 20 ng/ml RANTES or fibroblast-like synoviocyte-conditioned medium (FLS-CM). Representative microphotographs (original magnification  $\times 40$ ). Mean number of cells in matrigel-coated trans-well chamber were counted ( $n=4$ ). Values are mean $\pm$ SEM. \*,  $p<0.05$  vs. WT; ##,  $p<0.01$  vs. VEH. VEH, Vehicle.

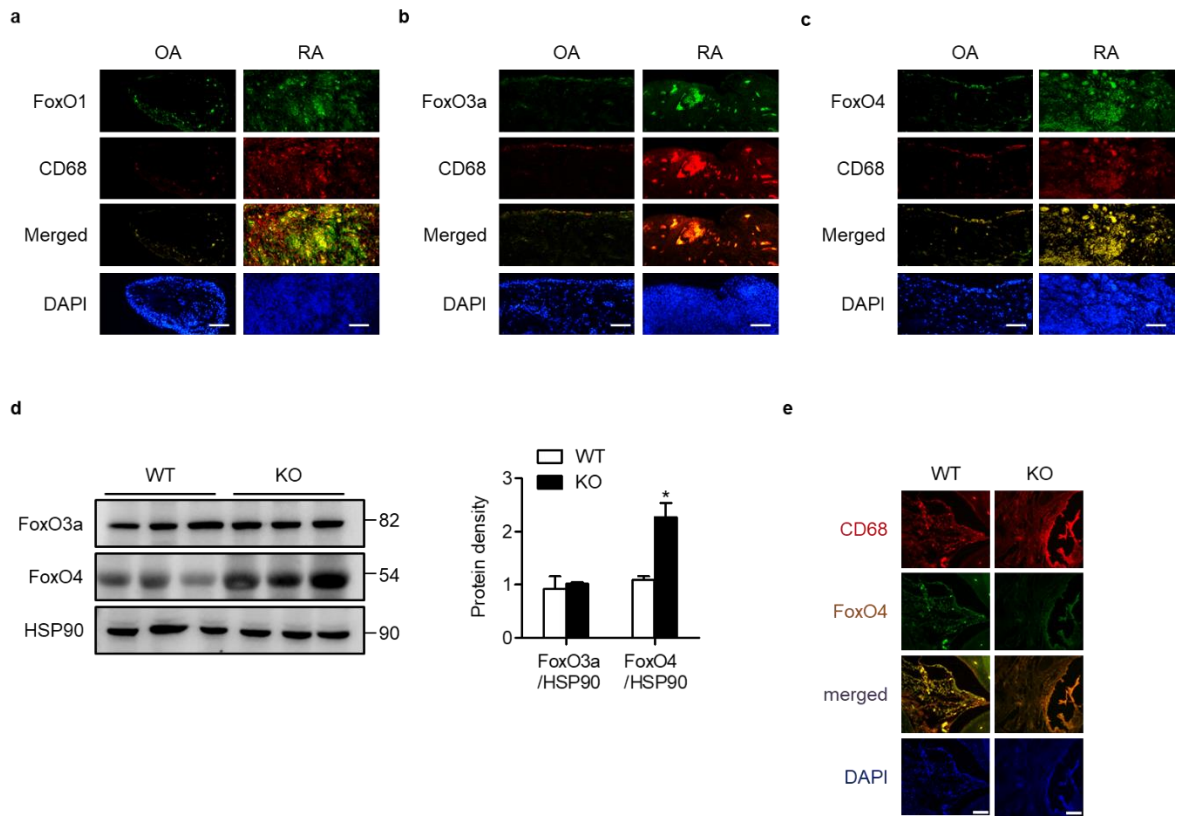

**Figure S4. The expression of FoxO3a and FoxO4.** (a-c) Staining of FoxO1, FoxO3a, and FoxO4 in the joint tissue from RA and OA patients (bar=100  $\mu$ m). (d) Protein levels of FoxO3a and FoxO4 in the ankle joints of CIA mice (n=3). (e) Staining of FoxO4 and CD68 in the ankle joints of CIA mice (bar=100  $\mu$ m). Values are mean $\pm$ SEM. \*,  $p < 0.05$  vs. WT.

## 2. Supplementary Tables

Table 1. Sequences and accession numbers for primers (forward, FOR; reverse, REV) used in real-time RT-PCR

| Gene           | Sequences for primers         | Accession No. |
|----------------|-------------------------------|---------------|
| <i>Foxo1</i>   | FOR: GAGTGGATGGTGAAGAGCGT     | NM_019739     |
|                | REV: TGCTGTGAAGGGACAGATTG     |               |
| <i>I11b</i>    | FOR: GGTCAAAGGTTTGAAGCAG      | NM_008361     |
|                | REV: TGTGAAATGCCACCTTTTGA     |               |
| <i>I16</i>     | FOR: CCACGGCCTTCCCTACTTC      | NM_031168     |
|                | REV: TTGGGAGTGGTATCCTCTGTGA   |               |
| <i>Nos2</i>    | FOR: TTCTGTGCTGTCCCAGTGAG     | NM_010927     |
|                | REV: TGAAGAAAACCCCTTGTGCT     |               |
| <i>Ccl2</i>    | FOR: ATTGGGATCATCTTGCTGGT     | NM_011333     |
|                | REV: CCTGCTGTTACAGTTGCC       |               |
| <i>Itgax</i>   | FOR: CACTCAGTGACTGCCAAAA      | NM_021334     |
|                | REV: CCTCAAGACAGGACATCGCT     |               |
| <i>Adgre1</i>  | FOR: TTCCTCGCCTGCTTCTTC       | NM_010130     |
|                | REV: CCCCCTCTGTATTCAACC       |               |
| <i>Itgam</i>   | FOR: AAGGATTCAGCAAGCCAGAA     | NM_008401     |
|                | REV: TAGCAGGAAAGATGGGATGG     |               |
| <i>Ccr2</i>    | FOR: AGCACATGTGGTGAATCCAA     | NM_009915     |
|                | REV: TGCCATCATAAAGGAGCCA      |               |
| <i>Ccr3</i>    | FOR: CATAGGGTGTGGTCTCAAAGC    | NM_009914     |
|                | REV: AAAGGACTTAGCAAAAATTCACCA |               |
| <i>Ccr5</i>    | FOR: GCAGGGTGCTGACATACCAT     | NM_009917     |
|                | REV: ATCCGTTCCCCCTACAAGAG     |               |
| <i>Ccr8</i>    | FOR: GCGGTGAAGAAATCAGGGTA     | NM_007720     |
|                | REV: CTCAGAAGAAAGGCTCGCTC     |               |
| <i>Ccl3</i>    | FOR: GTGGAATCTTCCGGCTGTAG     | NM_011337     |
|                | REV: ACCATGACACTCTGCAACCA     |               |
| <i>Ccl5</i>    | FOR: CCACTTCTTCTCTGGGTTGG     | NM_013653     |
|                | REV: GTGCCACGTCAAGGAGTAT      |               |
| <i>Mmp3</i>    | FOR: CCCCTGATGTCCTCGTGGTA     | NM_010809     |
|                | REV: GCACATTGGTGATGTCTCAGGTT  |               |
| <i>Mmp13</i>   | FOR: GGTCCTTGGAGTGATCCAGA     | NM_008607     |
|                | REV: TGATGAAACCTGGACAAGCA     |               |
| <i>Tnfsf11</i> | FOR: CCCACAATGTGTTGCAGTTC     | NM_011613     |
|                | REV: TCCTGAGACTCCATGAAAACG    |               |
| <i>Gapdh</i>   | FOR: CGTCCCGTAGACAAAATGGT     | NM_008084     |
|                | REV: TTGATGGCAACAATCTCCAC     |               |
| <i>Arg-1</i>   | FOR: CAGAAGAATGGAAGAGTCAG     | NM_007482     |
|                | REV: CAGATATGCAGGGAGTCACC     |               |
| <i>Clec10a</i> | FOR: ATGATGTCTGCCAGAGAACC     | NM-010796     |
|                | REV: ATCACAGATTTTCAGCAACCTT   |               |
| <i>Mrc1</i>    | FOR: CTCGTGGATCTCCGTGACAC     | NM_008625     |
|                | REV: GCAAATGGAGCCGTCTGTGC     |               |
| <i>Clec-7a</i> | FOR: AGGTTTTTCTCAGTCTTGCCCTC  | NM_020008     |
|                | REV: GGGAGCAGTGTCTCTTACTTC    |               |

**Table S2. Characteristics of the study patients**

| Characteristics           | OA<br>(n=23)  | RA (mild)<br>(n=7) | RA (severe)<br>(n=13) |
|---------------------------|---------------|--------------------|-----------------------|
| Age (years)               | 55.4 ± 1.2    | 48 ± 7.2           | 57.9 ± 3.9            |
| Sex                       | F = 22, M = 1 | F = 6, M = 1       | F = 12, M = 1         |
| Disease duration (months) | 35.8 ± 8.1    | 28.3 ± 13          | 40.7 ± 9.2            |
| ESR (mm/h)                | 25.8± 2.9     | 47.9± 8.5          | 73± 5.7               |
| CRP (mg/l)                | 0.6 ± 0.1     | 7.8 ± 3.2          | 25.2 ± 5.2            |
| Tender joint              | N/A           | 2.1 ± 0.5          | 9.5 ± 1.1             |
| Swollen joint             | N/A           | 1.3± 0.5           | 8.2± 0.9              |
| Pain VAS (mm)             | N/A           | 25.7± 4.3          | 64.6± 5.5             |
| DAS28-ESR                 | N/A           | 4.1± 0.3           | 6.4± 0.2              |
| DAS28-CRP                 | N/A           | 3.1 ± 0.2          | 5.4 ± 0.2             |
| RF (%)                    | 0             | 100                | 100                   |
| Anti-CCP (%)              | 0             | 100                | 100                   |
| Use of DMARDs (%)         | N/A           | 0                  | 0                     |

Data are mean±SEM. Abbreviations: RA, rheumatoid arthritis; OA, osteoarthritis; ESR, erythrocyte sedimentation rate; CRP, C-reactive protein; VAS, visual analogue scale; DAS28, disease activity score; RF, rheumatoid factor; Anti-CCP, Anti-cyclic citrullinated peptide; DMARD, disease modifying anti-rheumatic drug; N/A, not applicable.
